# Supplementary material for: The macroscopic limit to synchronization of cellular clocks in single cells of Neurospora crassa
Source: Sci Rep. 2022 Apr 25;12:6750. doi: 10.1038/s41598-022-10612-2 (PMC9039089; doi:10.1038/s41598-022-10612-2)
Supplement: Supplementary file 2 — Supplementary Information 1. [file 41598_2022_10612_MOESM2_ESM.docx]

Supplementary Materials for

The macroscopic limit to synchronization of cellular clocks in single cells of *Neurospora crassa*

**Authors:** Jia Hwei Cheong1,8, Xiao Qiu2,8, Yang Liu1, Ahmad Al-Omari3, James Griffith4,5, Heinz-Bernd Schüttler6, Leidong Mao7*, Jonathan Arnold4*

**8**Both authors have contributed equally to this work.

**Affiliations:**

1Chemistry Department, University of Georgia, Athens, GA 30602.

2Institute of Bioinformatics, University of Georgia, Athens, GA 30602.

3Department of biomedical Systems and Informatics Engineering, Yarmouk University, Irbid, Jordan 21163

4 Genetics Department, University of Georgia, Athens, GA 30602

5College of Agricultural and Environmental Sciences, University of Georgia, Athens, GA 30602.

6Department of Physics and Astronomy, University of Georgia, Athens, GA 30602.

7 School of Electrical and Computer Engineering, College of Engineering, University of Georgia, Athens, GA 30602.

***Corresponding authors**: Jonathan Arnold, [arnold@uga.edu](mailto:arnold@uga.edu); Leidong Mao, [mao@uga.edu](mailto:mao@uga.edu)

Correspondence to [arnold@uga.edu](mailto:arnold@uga.edu) and mao@uga.edu

**This pdf includes:**

Table S1

Fig. S1, S2, S3, S4, S5, S6, and caption for video S1.

**Other supplementary materials include:**

Video S1

**Table S1** The rate constants for the quorum sensing (column 3) are similar to isolated single cells1 (column 2) and those at the macroscopic limit of 107cells per ml2 (column 4)

| **Parameter** | **Initial Parameter values from published ensemble (column 4) computed by Parallel tempering for D/D experiment1** | **Best parameter values from model ensemble computed by microwell D/D experiment under quorum sensing model** | **Initial Parameter values from published ensemble (column 3) computed by Parallel tempering for D/D experiment2** |
| --- | --- | --- | --- |
| Number of communicating cells | 1 | 240 | ~107 cells/ml |
| A | 2.56E−10 | 6.852861E-03 | 0.0313 |
| Ā | 1.589532708 | 1.013056E-01 | 0.1108 |
| S1 | 80.12566921 | 3.352361E+01 | 0.000420 |
| S3 | 0.400641074 | 1.708023E-03 | 5.47E-5 |
| S4 | 8,316.020583 | 1.932607E+01 | 1.252 |
| D1 | 1.294999006 | 1.195490E+00 | 6.607 |
| D3 | 4.382612039 | 1.855057E+00 | 0.798 |
| C1 | 0.000932789 | 1.685434E-03 | 1.047 |
| L1 | 4.777735371 | 4.268960E+01 | 94.39 |
| L3 | 0.665600817 | 5.283324E+00 | 63.93 |
| D4 | 0.08474029 | 5.428893E-01 | 0.00451 |
| D6 | 0.193685712 | 5.775316E-01 | 0.205 |
| D7 | 2.130911791 | 4.301660E-02 | 0.135 |
| D8 | 0.007744621 | 6.586861E-05 | 0.0122 |
| C2 | 1.515554675 | 3.583455E+00 | 3.322 |
| P | 2.72E−09 | 9.845228E+01 | 0.2233 |
| Ac | 1.86E−08 | 1.109814E+01 | 0.1293 |
| Bc | 2.581096866 | 9.345902E-01 | 0.6091 |
| Sc | 61.51499414 | 1.458434E-03 | 2.572 |
| Lc | 1.61524392 | 1.256038E-08 | 3.664 |
| Dcr | 0.150810052 | 6.049845E+01 | 0.579 |
| Dcp | 0.54063952 | 3.940957E-01 | 0.5536 |
| KS1 | -- | 4.612788E+09 | -- |
| C4 | -- | 2.646258E+00 | -- |
| η | -- | 1.445784E-05 | -- |
| ηext | -- | 4.094524E-01 | -- |
| D9 | -- | 2.150455E+01 | -- |
| D10 | -- | 3.057320E-08 | -- |


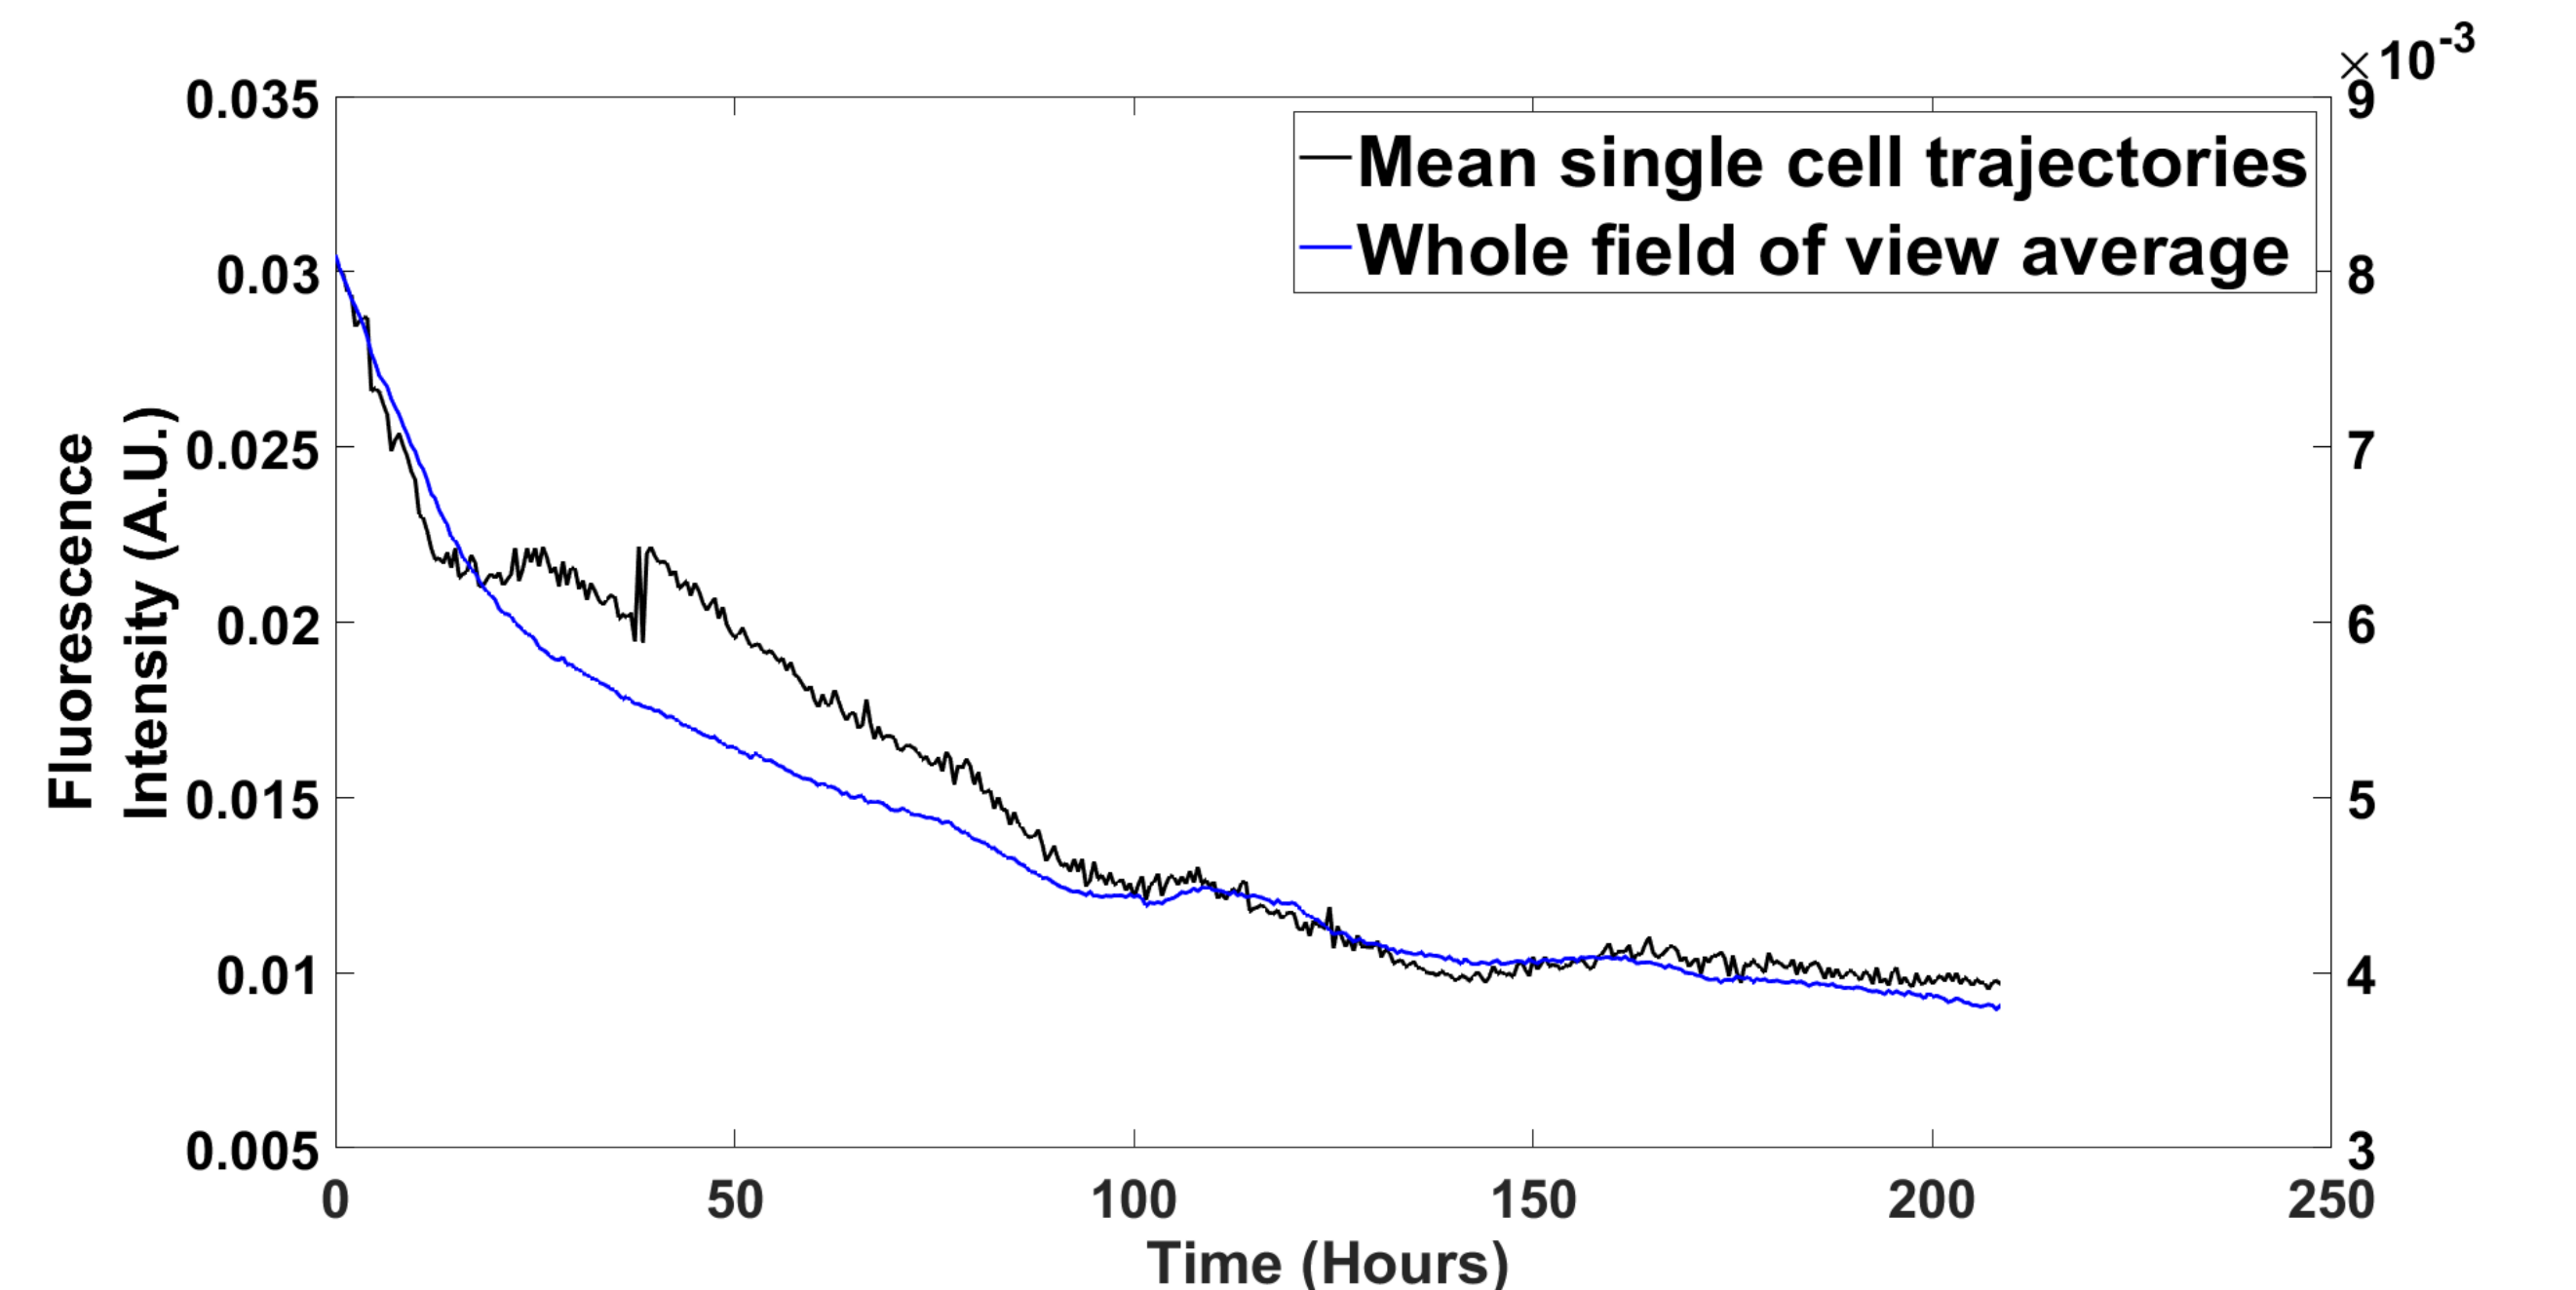


**Fig. S1** Mean single cell trajectories from the chamber microfluidic device tracked the whole field of view average intensity very well. **The plots were created in MATLAB_R2020B (**<https://www.mathworks.com/products/matlab.html>).


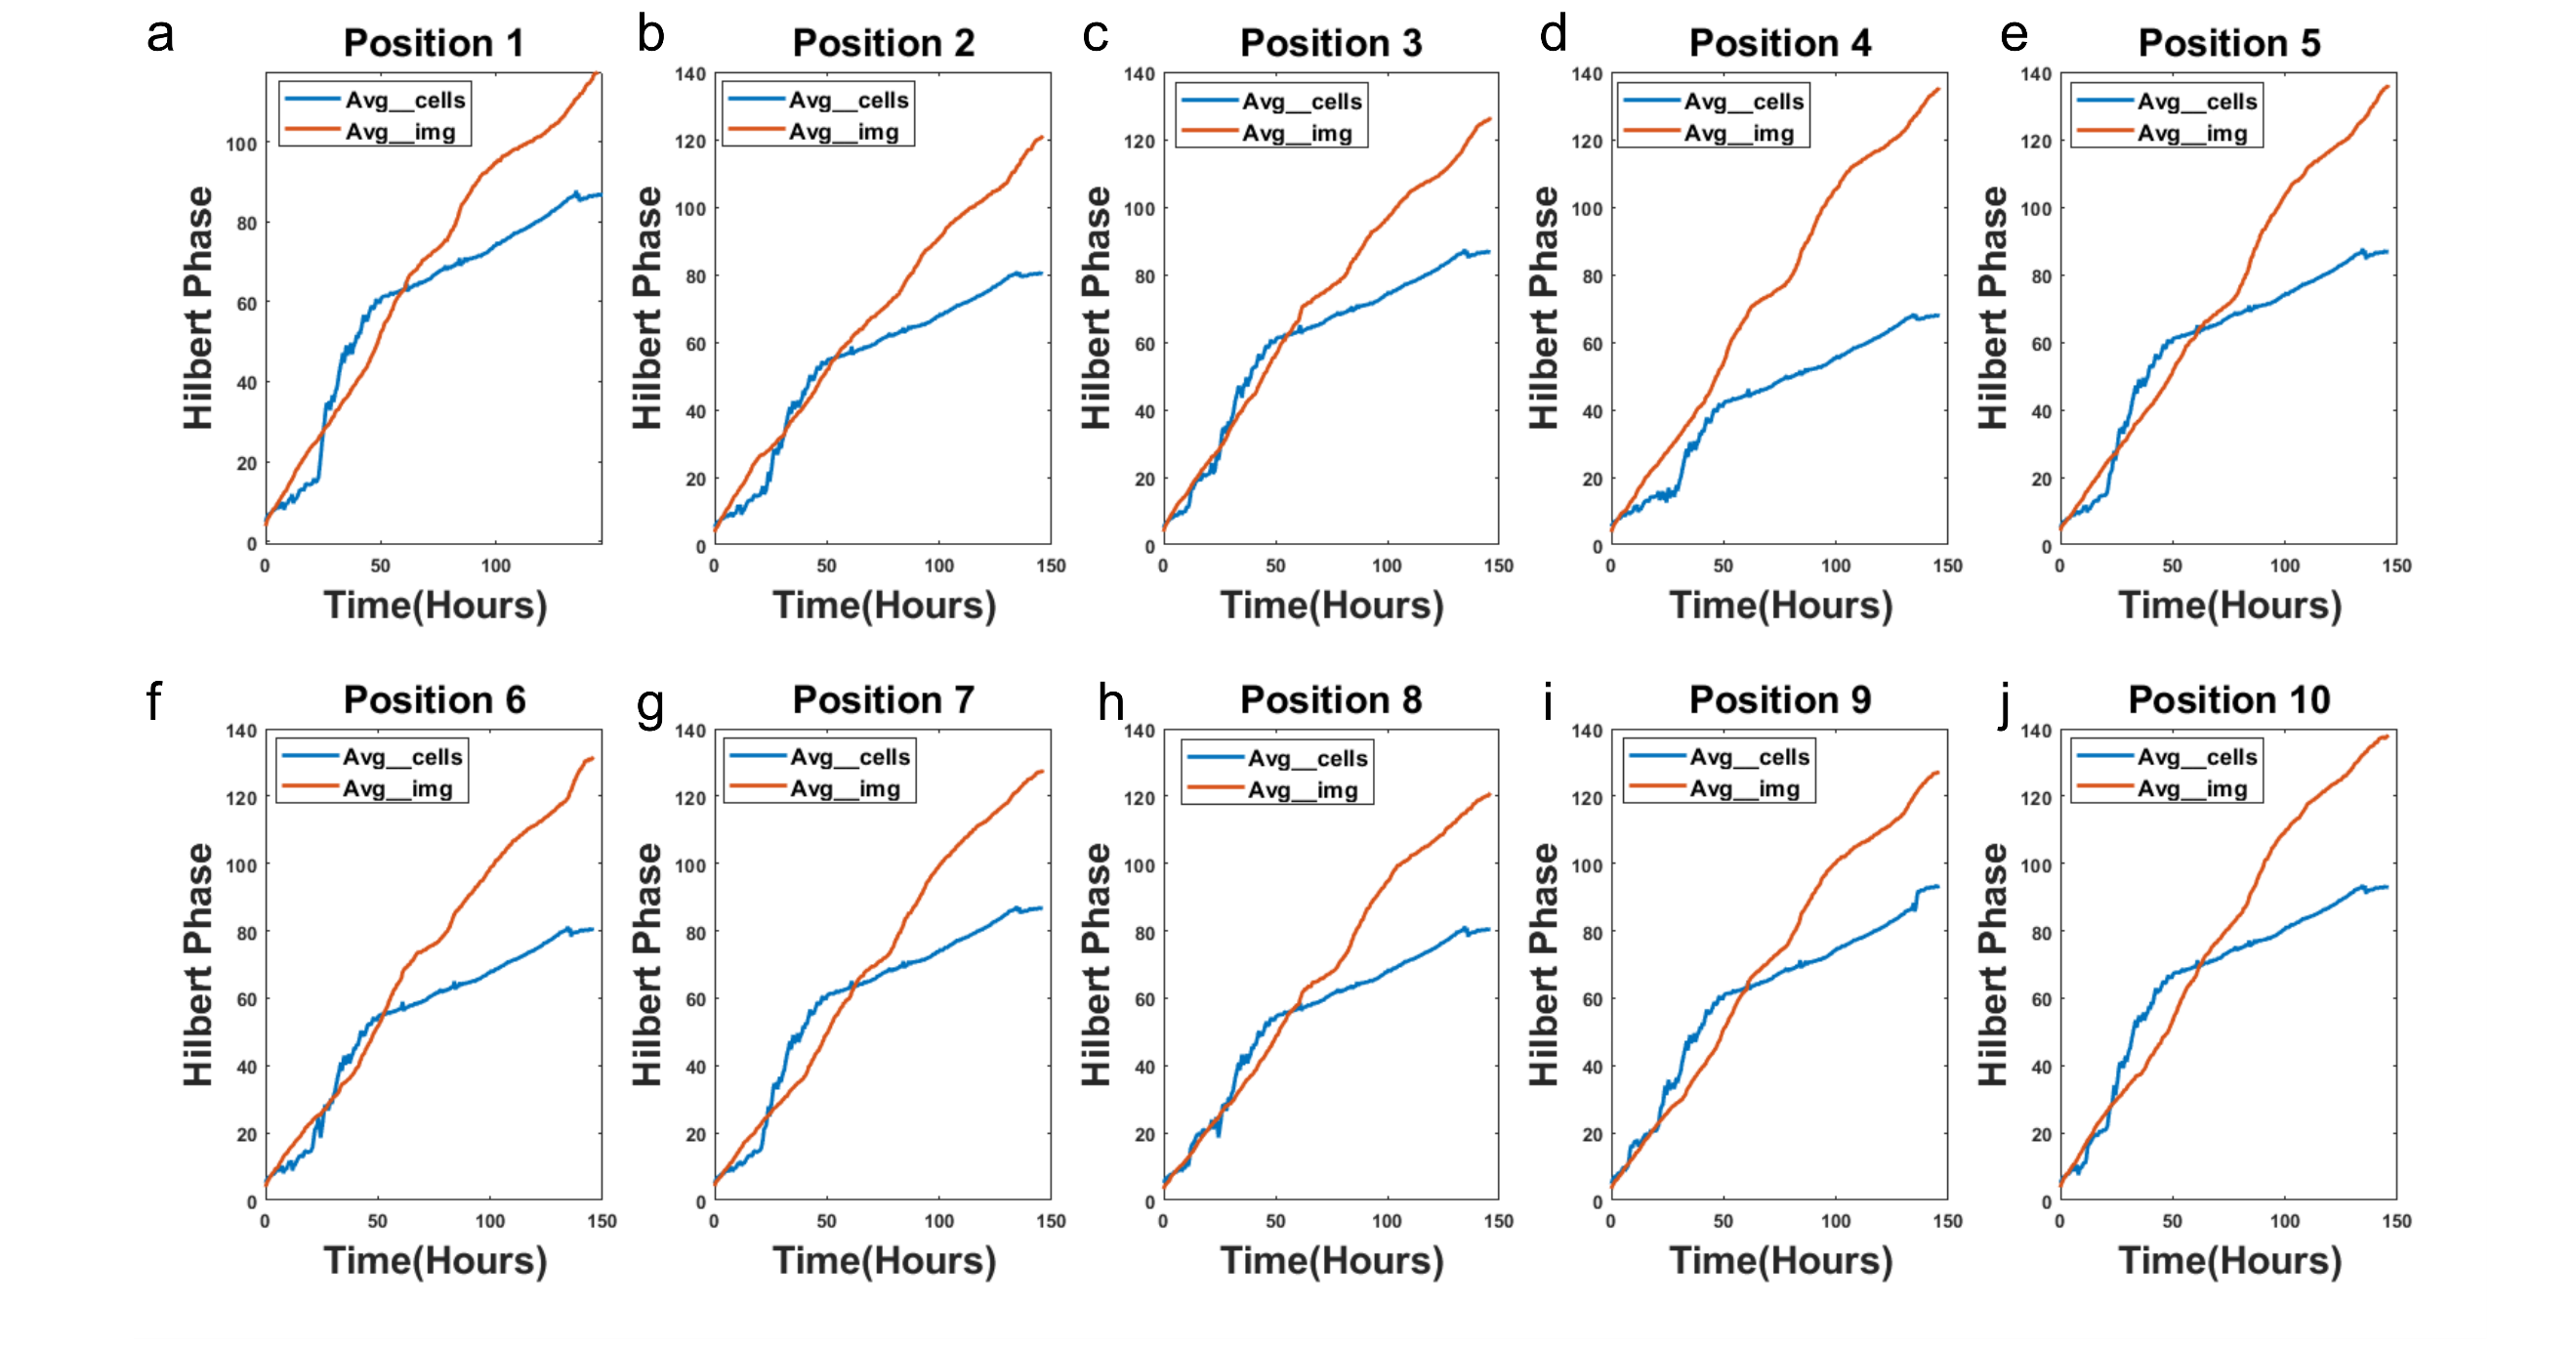


**Fig. S2** Average Phase of single cells tracks phase of a field of view across 10 fields of view in the big chamber device. The strain is MFNC9 (see Materials and Methods). Cells were grown in media 5 (see Materials and Methods) to block cell division. Fluorescence was measured every half hour over 10 days. **The plots were created in MATLAB_R2020B (**<https://www.mathworks.com/products/matlab.html>).


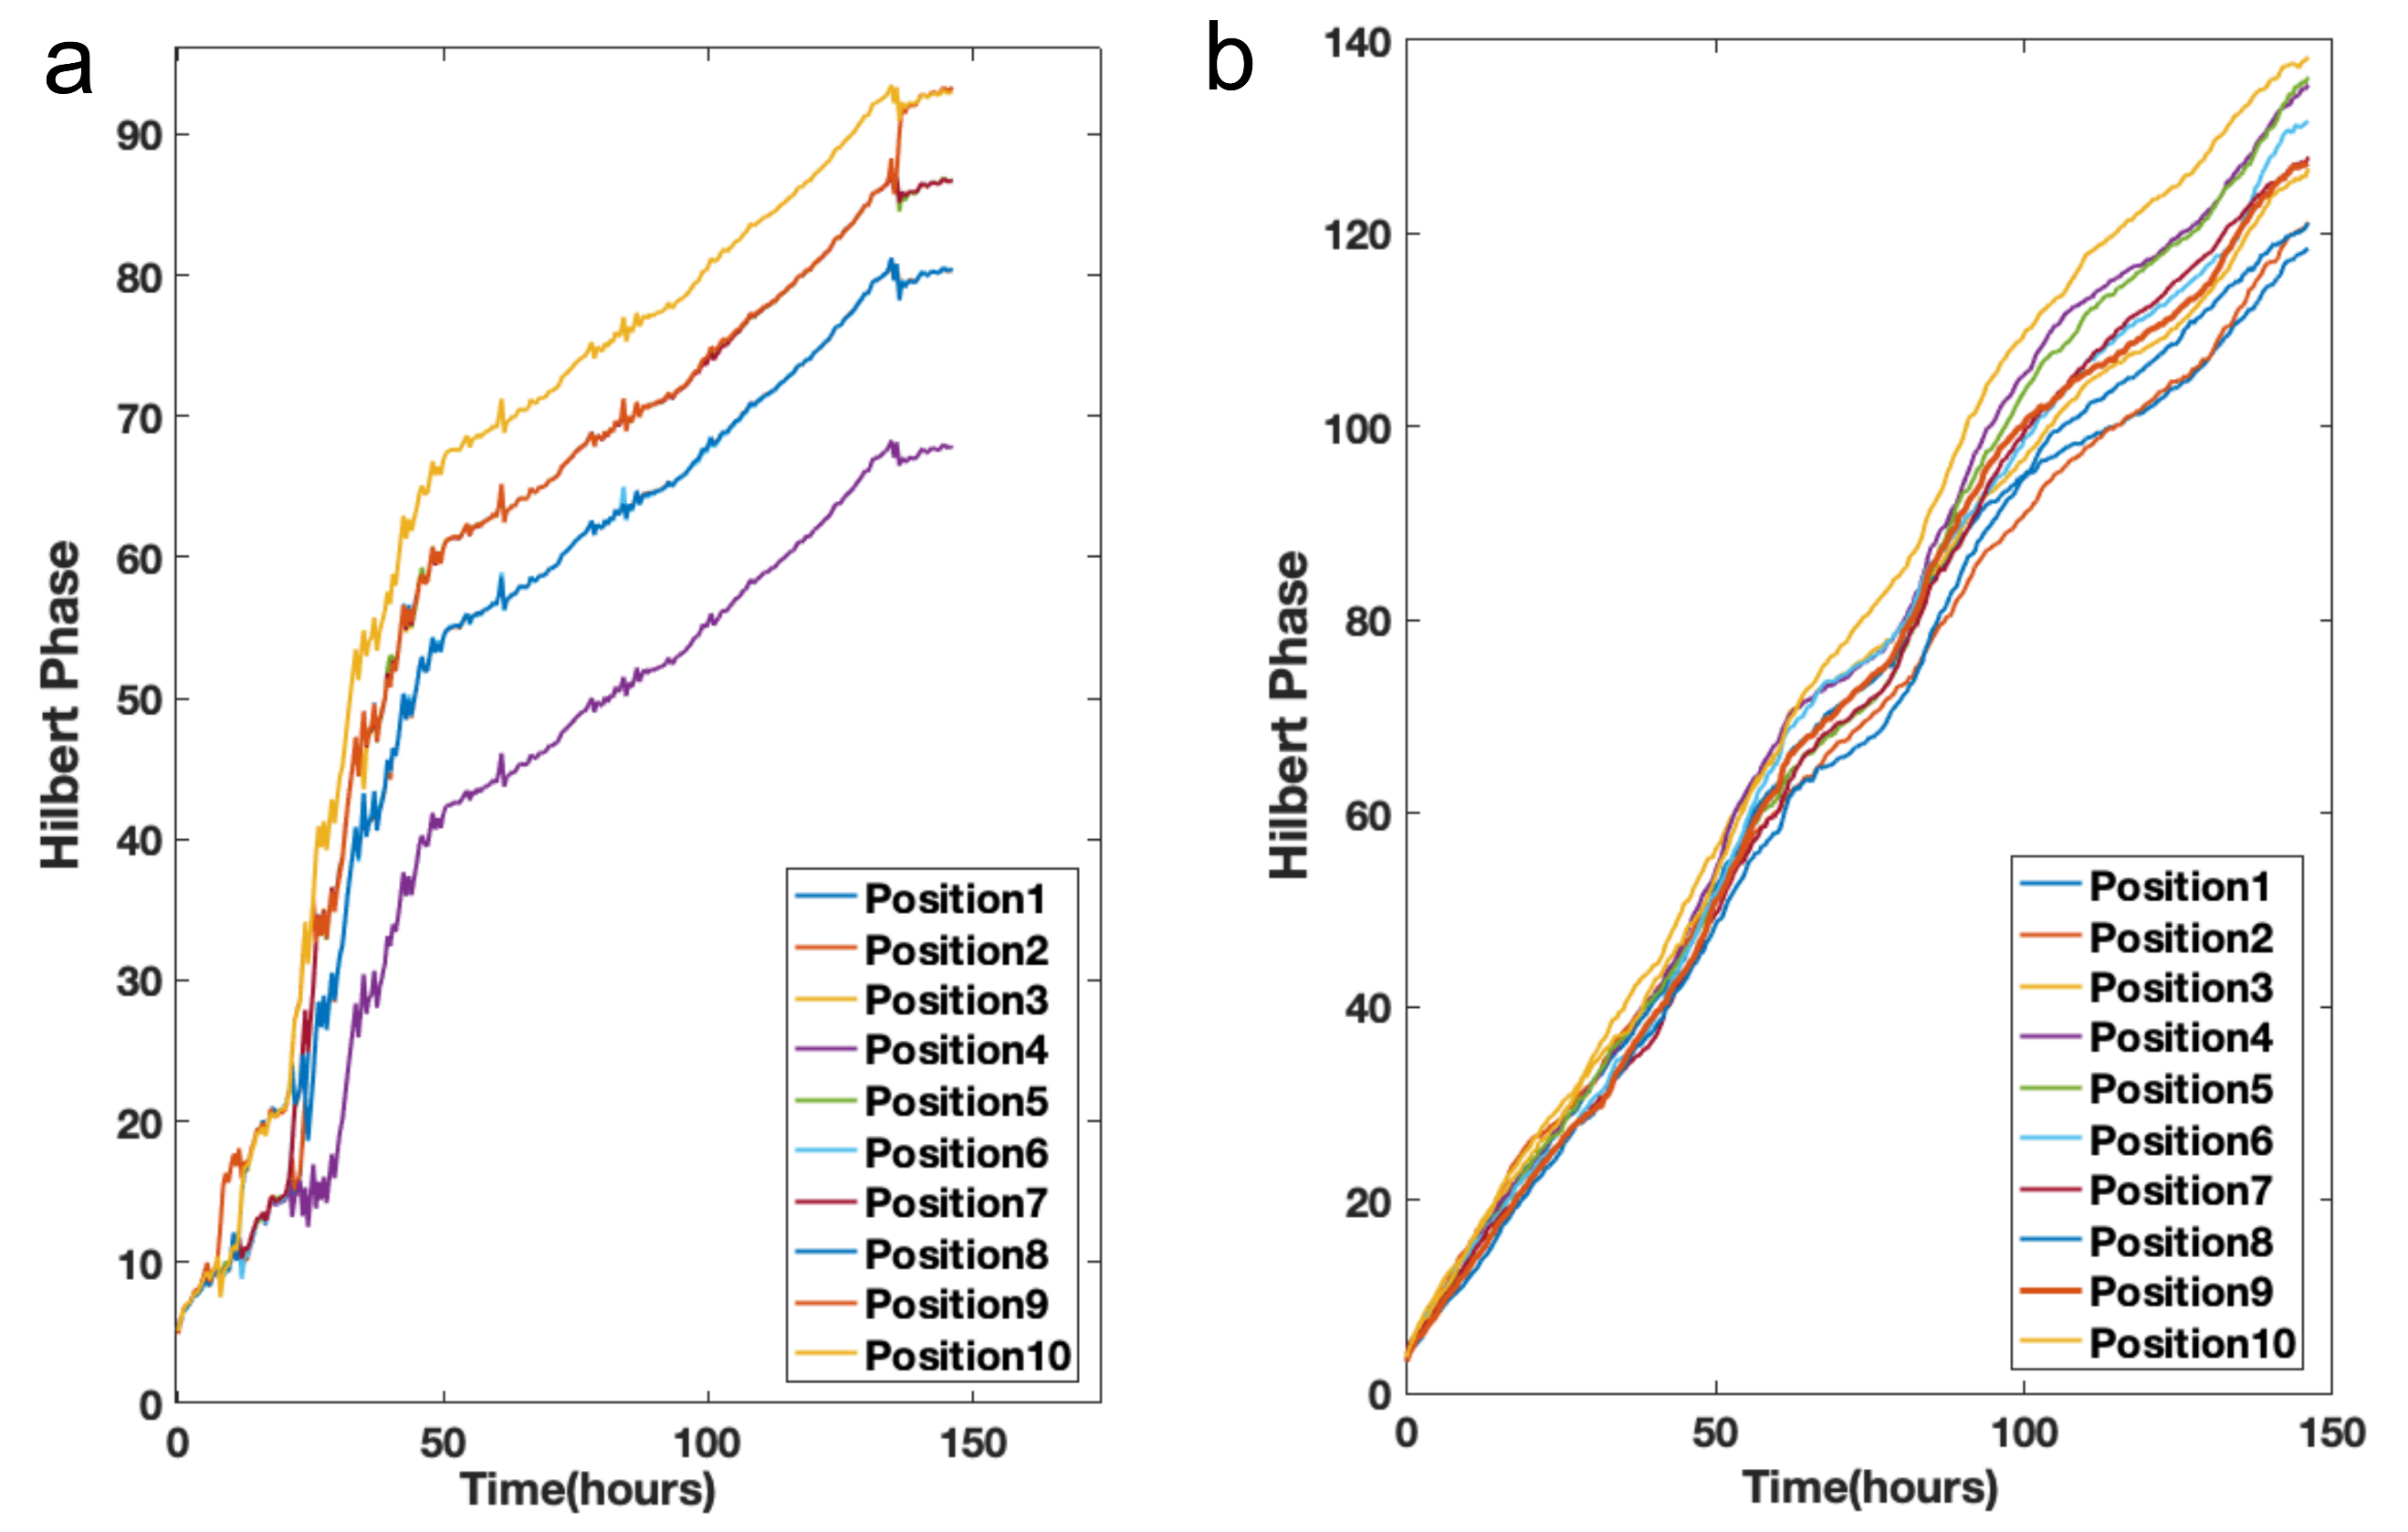


**Fig. S3** While the phase curves do track each other, they also fan out over time. The Hilbert phase curves from single cell trajectories were computed as described earlier3. (a) average of image (b) average of cells tracked. Single cell tracking was done with CellProfiler4. **The plots were created in MATLAB_R2020B (**<https://www.mathworks.com/products/matlab.html>).


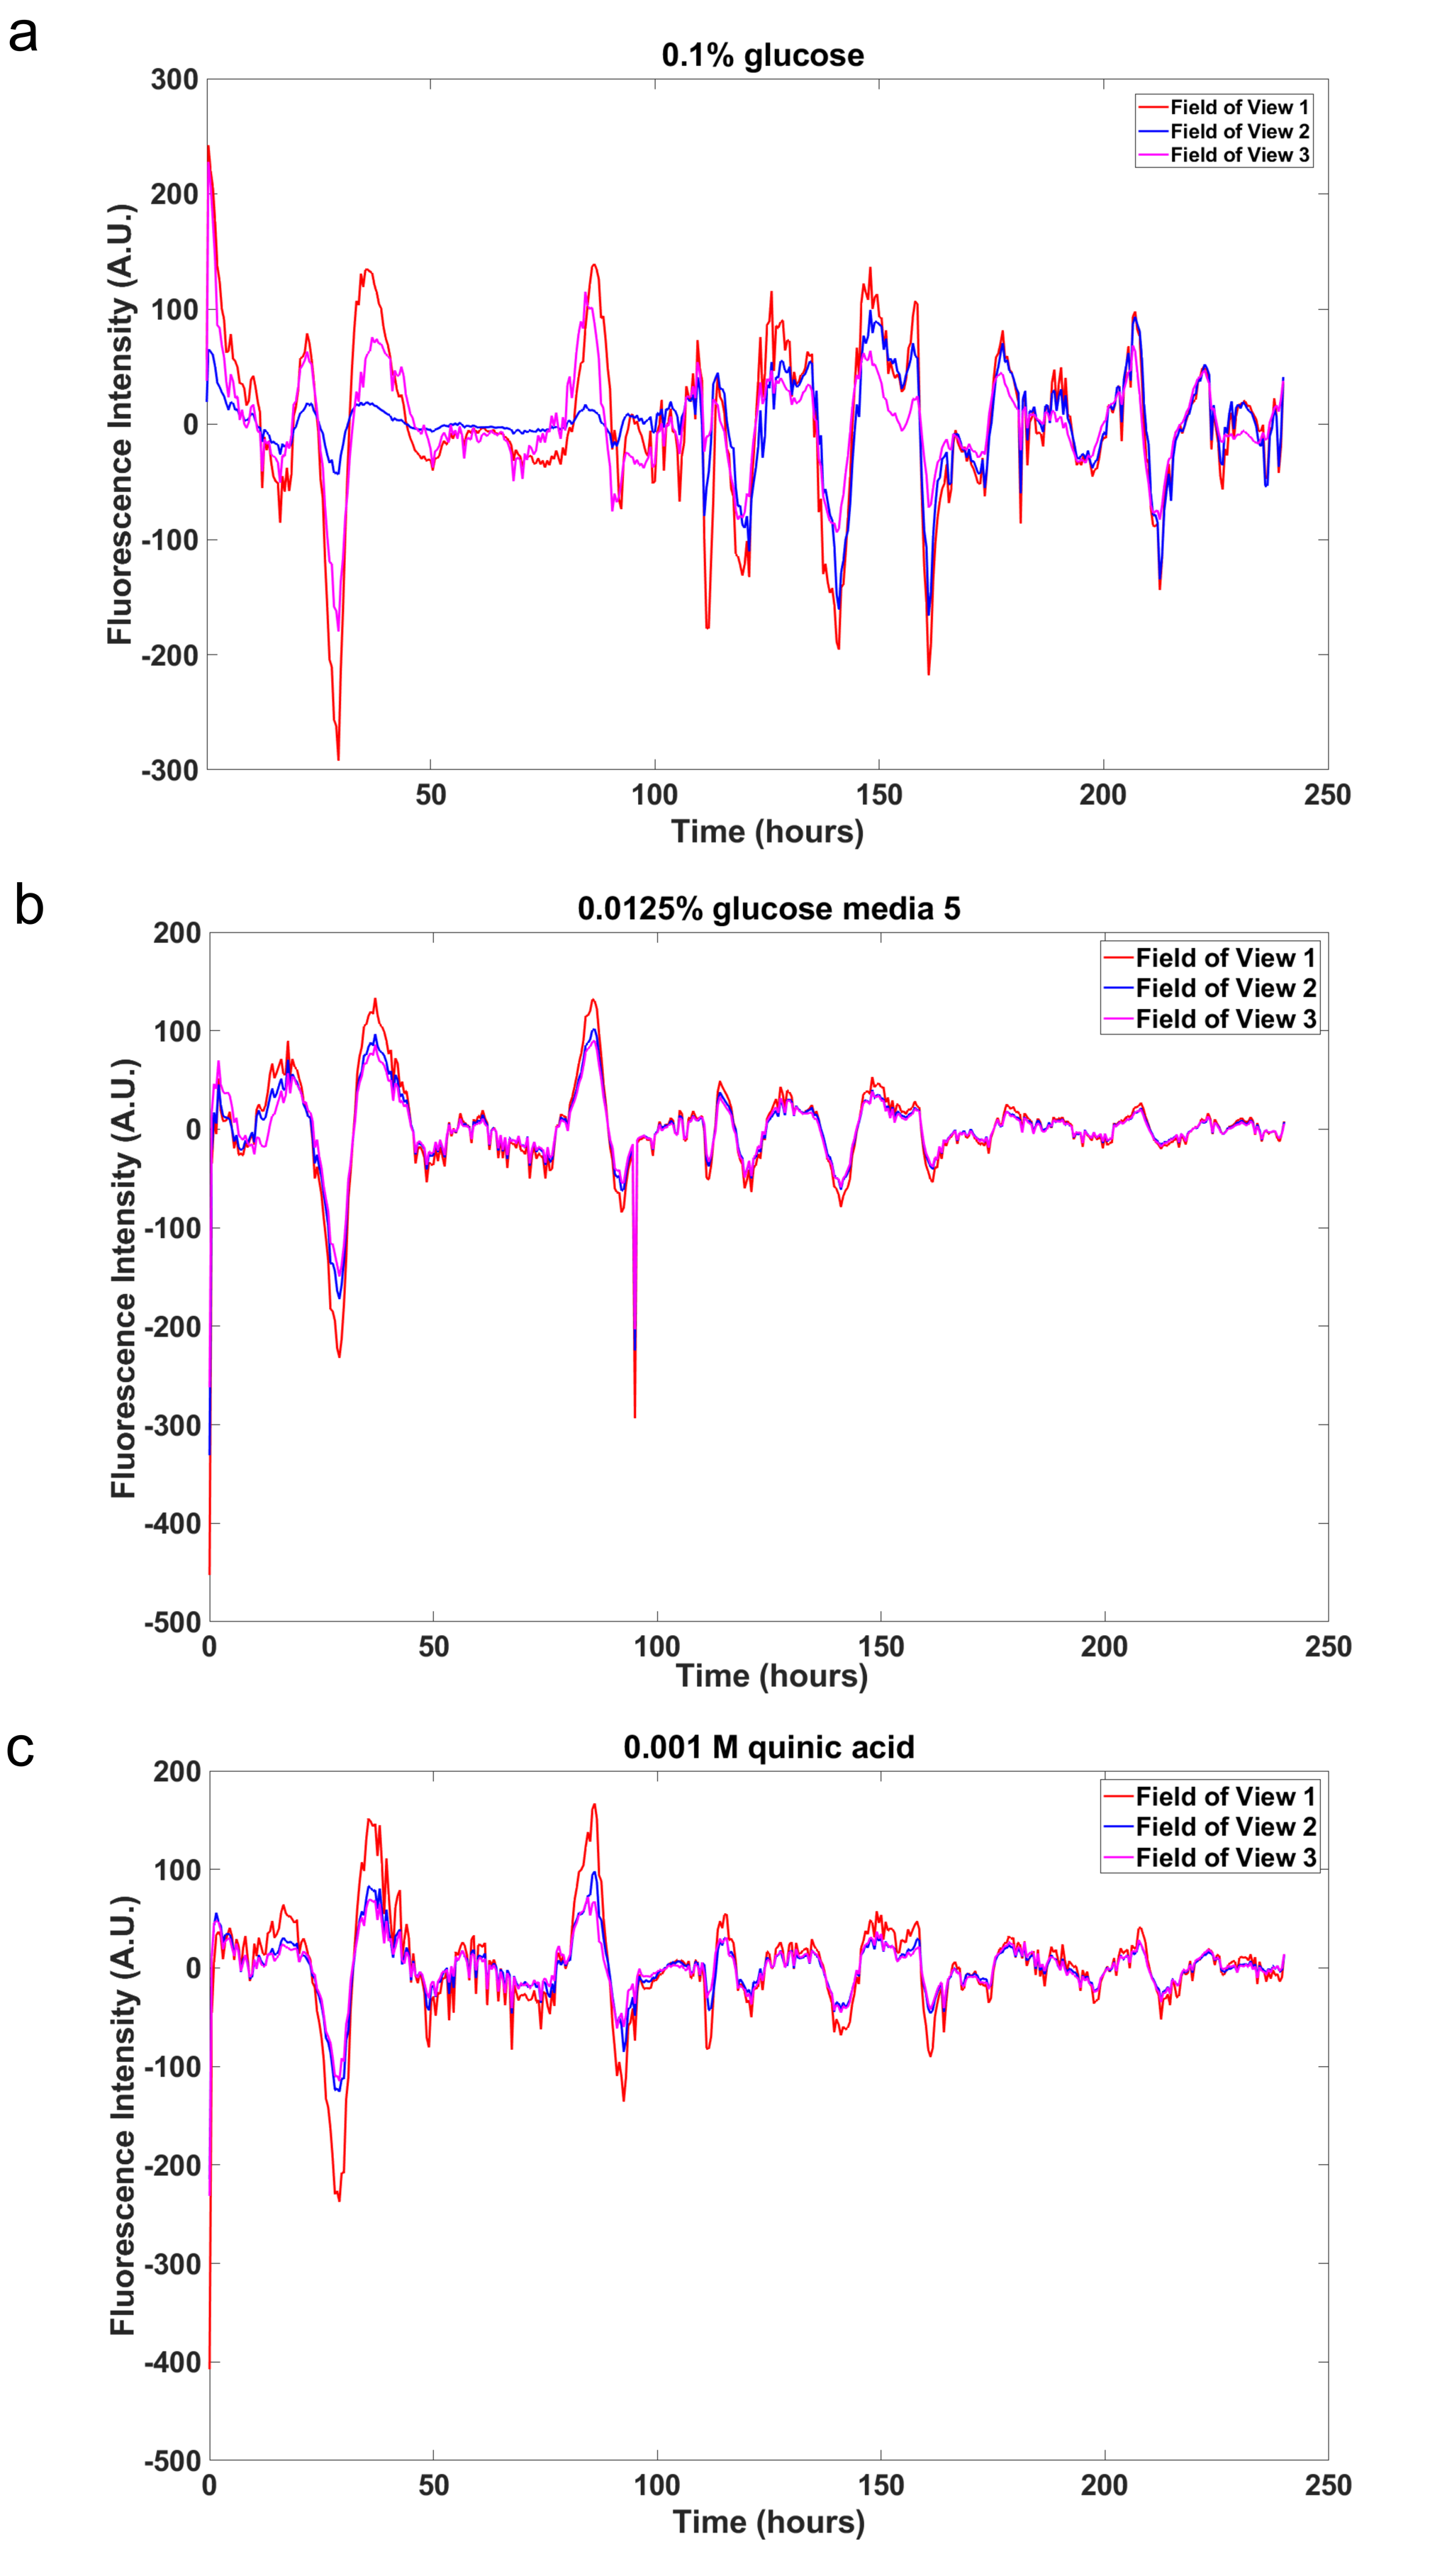


**Fig. S4** The fields of view in the big chamber device are highly synchronous in different media: (**a**) 0.1% glucose; (**b**) 0.0125% glucose; (**c**) 0.001 M quinic acid. **The plots were created in MATLAB_R2020B (**<https://www.mathworks.com/products/matlab.html>).


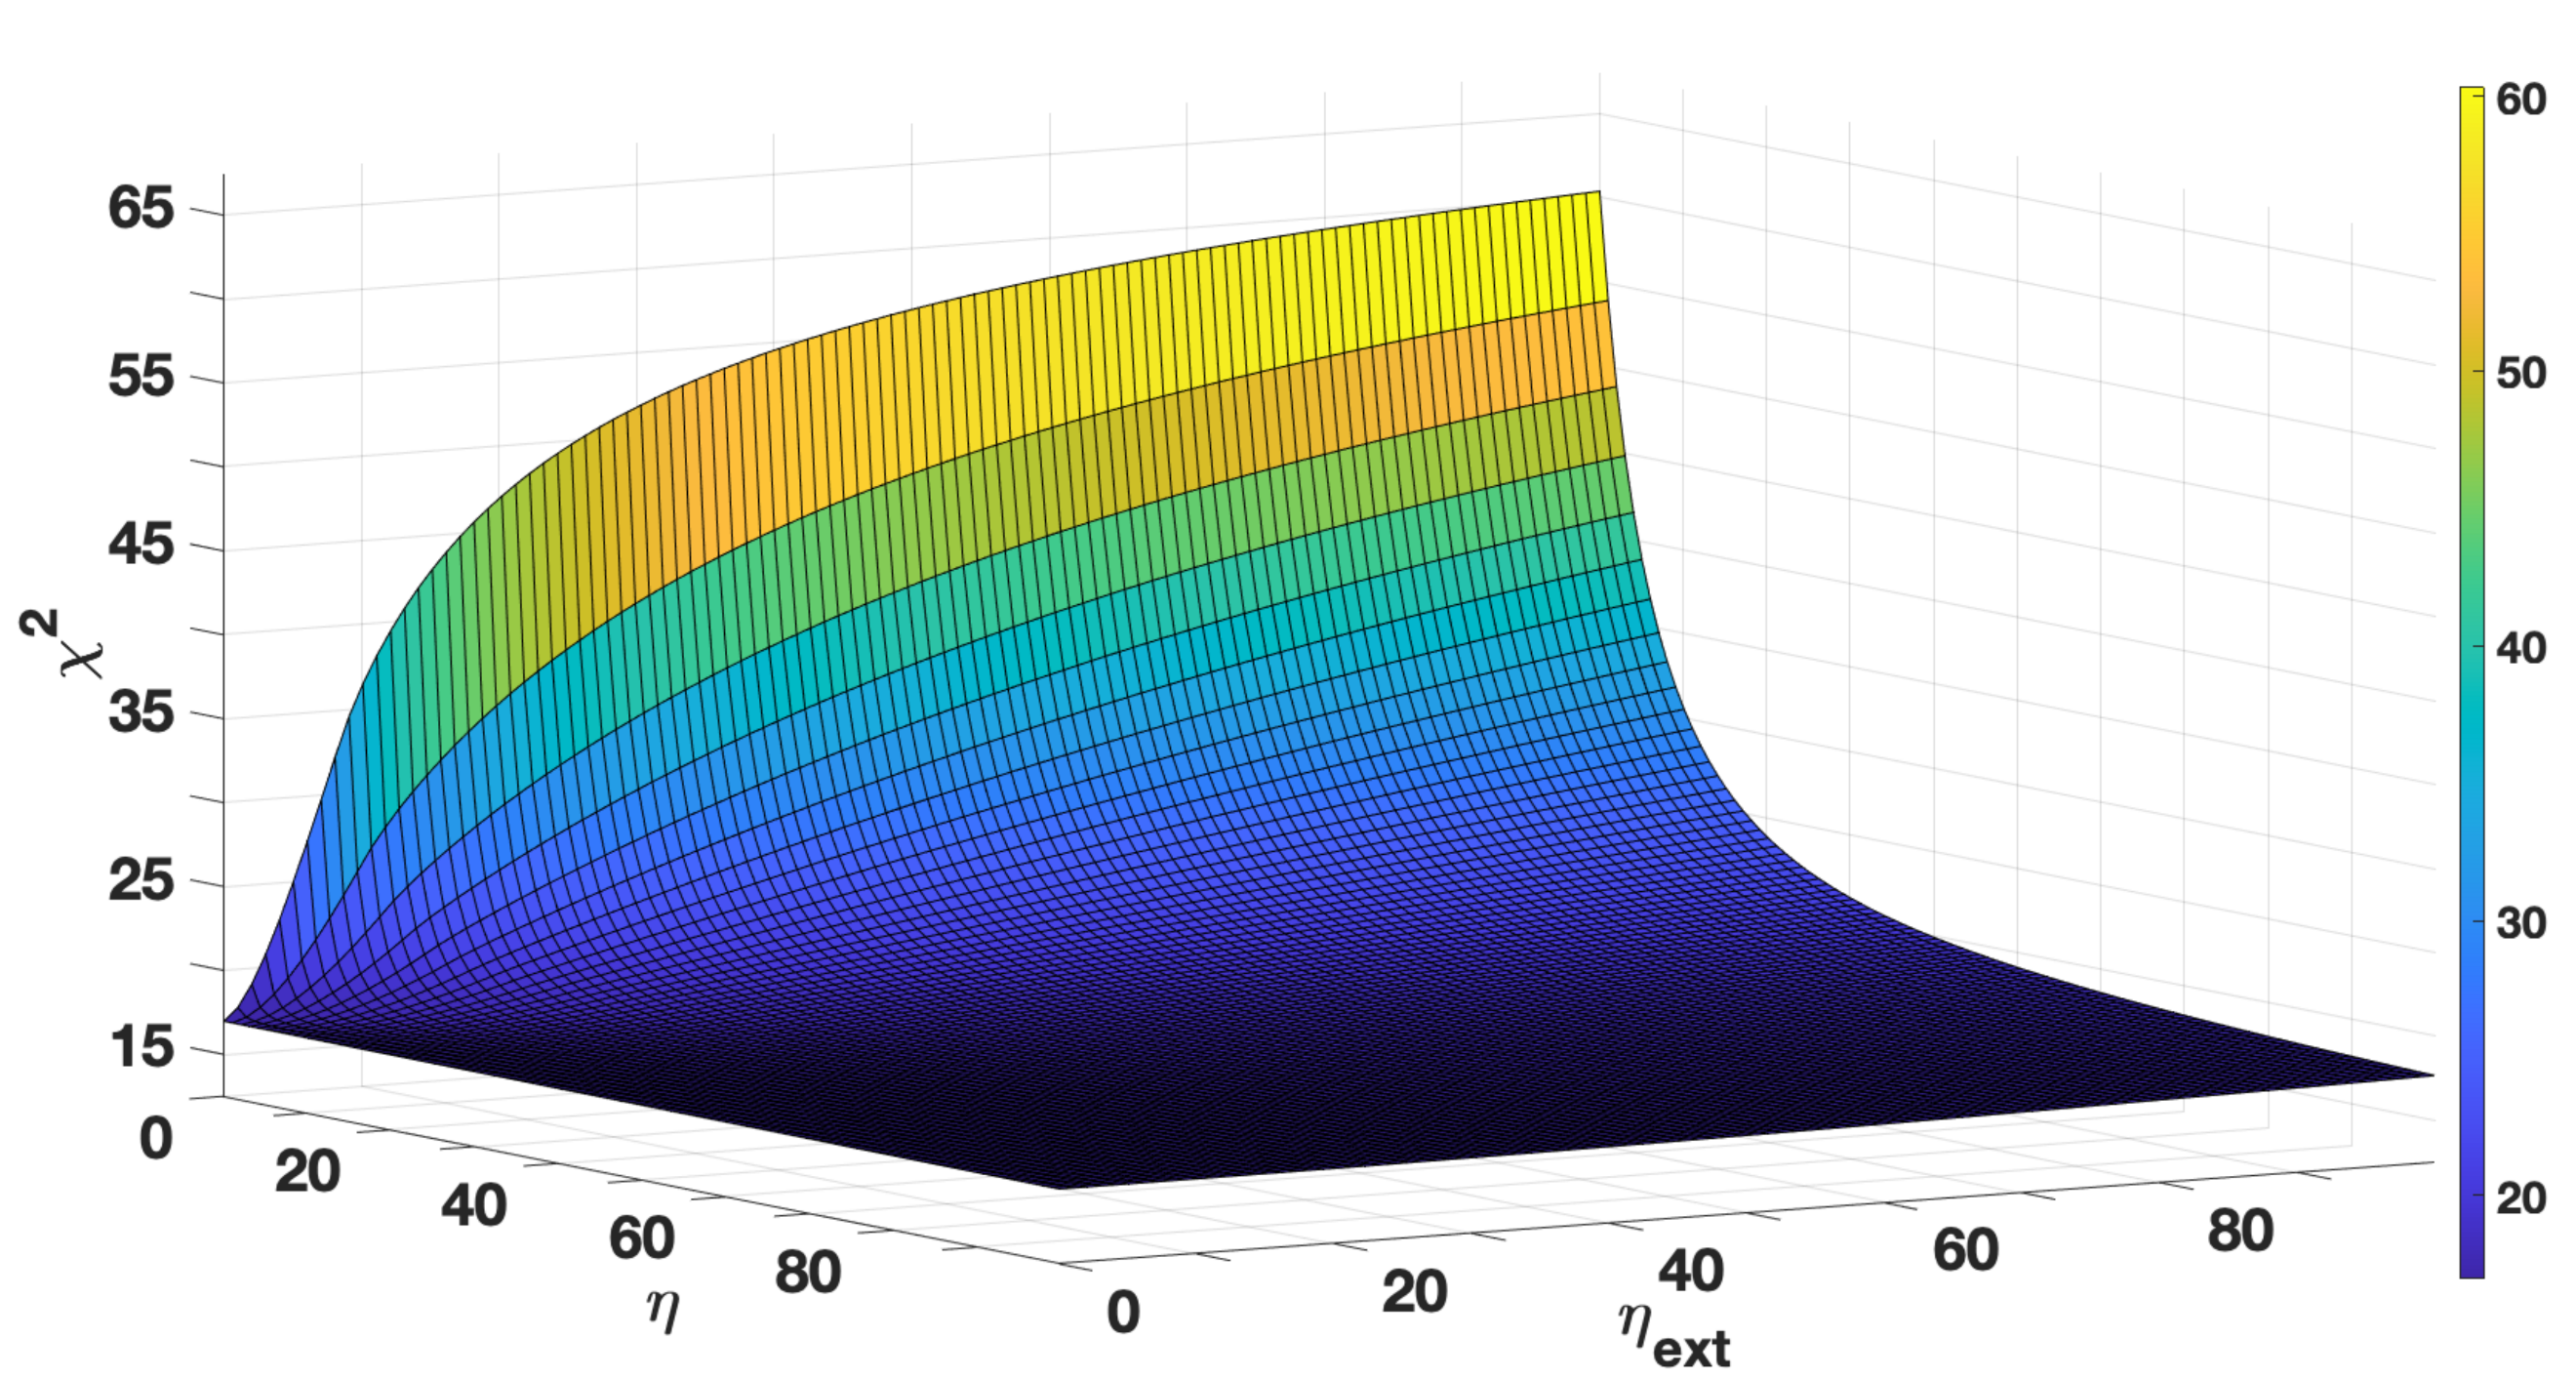


**Fig. S5** There is limited information about the diffusion parameters ( and ) for communication under the quorum sensing model as indicated by the chi-squared statistic surface as a function of and For example, the surface is nearly flat with respect to . There is more information about – the surface increases sharply for around ~20 or below. Other parameters are set at their best values with respect to the chi-squared statistic in supplement Table S1. **The plots were created in MATLAB_R2020B (**<https://www.mathworks.com/products/matlab.html>).


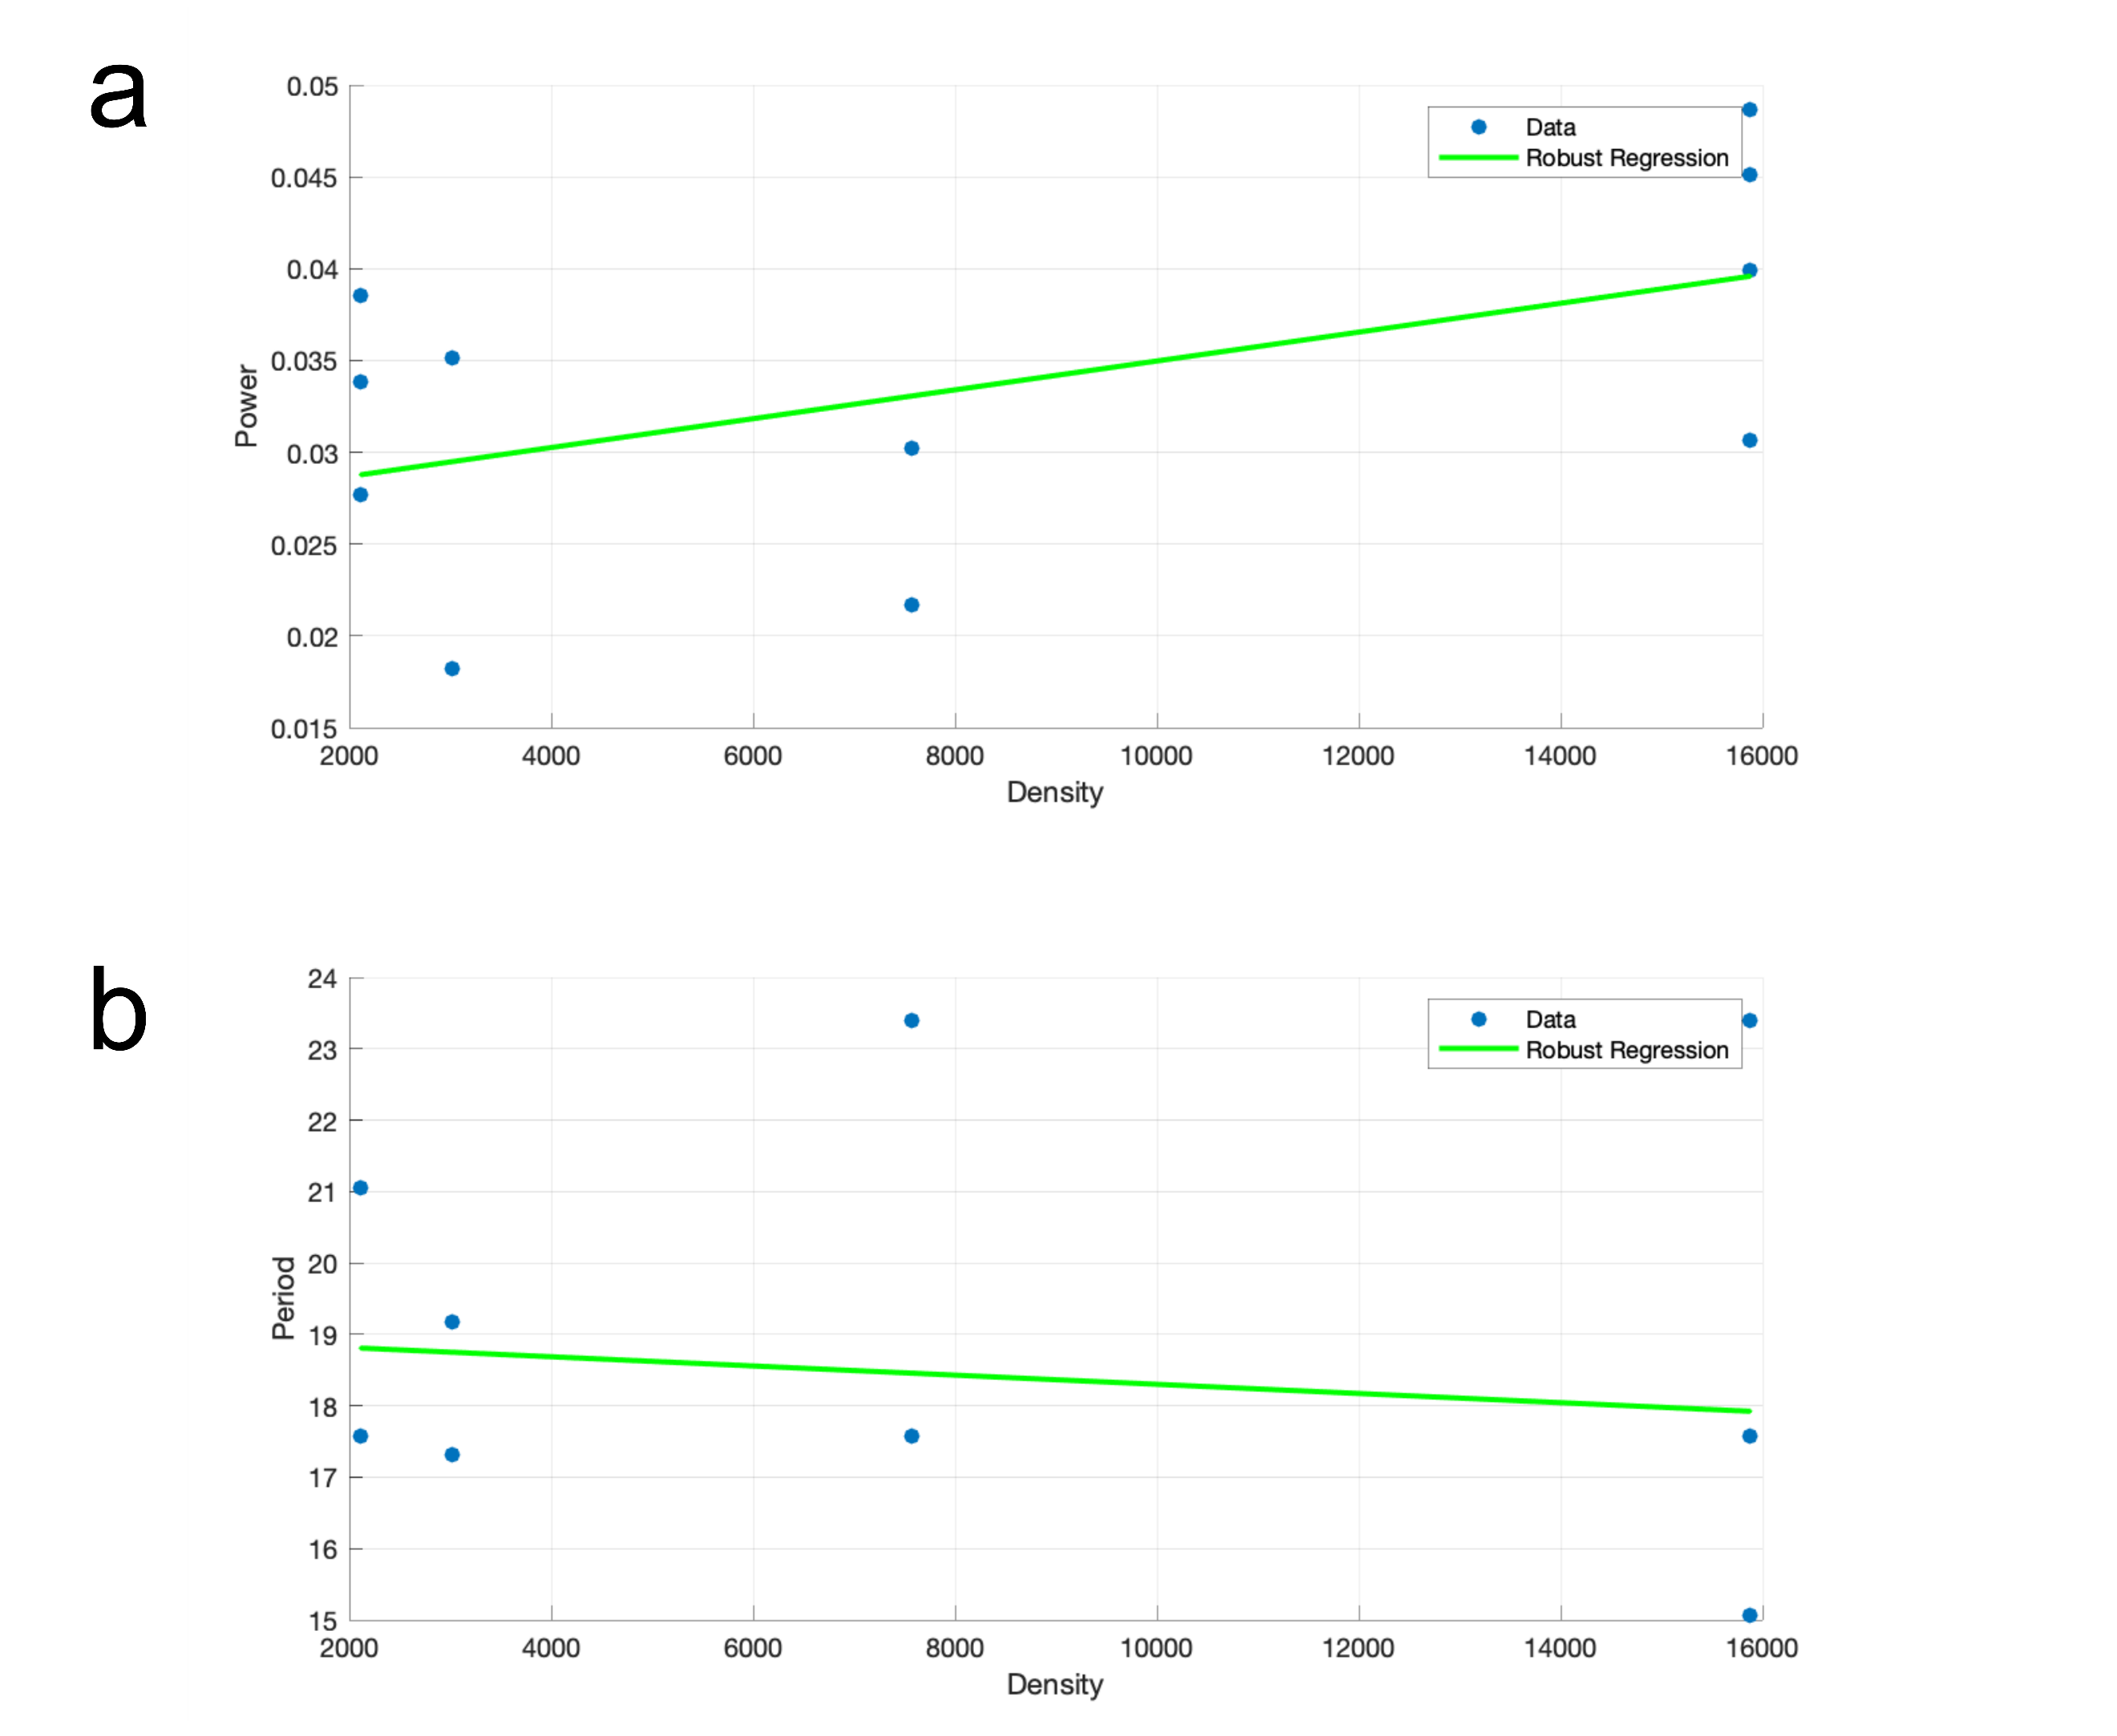


**Fig. S6 Relation between average Amplitude and Period of cell(s) in wells to Density in microwell device in Fig 11.** (**a**)Robust Regression of amplitude (as measured by the maximum in the periodogram) on number of cells for each microwell chamber using an M-estimator64 from 3 separate microwell experiments. The predicted regression line is amplitude = 0.03 + (7.86 4.12)(10-7) x density (t15 = 1.9088, P = 0.04). At least 5,000 cells were tracked in each microwell experiment. (**b)** Robust Regression of Period on number of cells for each microwell chamber using an M-estimator64 from 3 separate microwell experiments. The slope of the predicted regression line is not significantly different from zero (t15 = -1.236, P = 0.55). At least 5,000 cells were tracked in each microwell experiment. All t-tests were one sided as in Fig. 11 for the sake of comparison to Fig. 11b.

**References**

1 Caranica, C., Al-Omari, A., Schuttler, H.-B. & Arnold, J. Identifying a clock stochastic network with light entrainment for single cells of *Neurospora crassa* by ensemble methods. *Nature Scientific Reports* **19**, 15168 (2020).

2 Dong, W. *et al.* Systems biology of the clock in Neurospora crassa. *PloS one* **3**, e3105 (2008).

3 Caranica, C. *et al.* What is phase in cellular clocks? *Yale Journal of Biology and Medicine* **92**, 169-178 (2019).

4 McQuin, C. *et al.* CellProfiler 3.0: Next-generation image processing for biology. *PLOS Biology* **16**, e2005970, doi:10.1371/journal.pbio.2005970 (2018).

5 Yu, Y. *et al.* A genetic network for the clock of *Neurospora crassa*. *Proc Natl Acad Sci USA* **104**, 2809-2814 (2007).
